# Supplementary material for: An “off–on” phosphorescent aptasensor for the detection of thrombin based on PRET
Source: Royal Society of Chemistry journal article supplement (doi:10.1039/c8an01571f), 2018-10-02
Supplement: c8an01571f1.pdf [file c8an01571f1.pdf]

## Supplementary Information

### **An “off-on” phosphorescent aptasensor for the detection of thrombin based on PRET**

Yan Xiong, Meiyu Liang, Yue Cheng, Jiarui Zou, Yan Li\*

*Key Laboratory of Inorganic-Organic Hybrid Functional Materials Chemistry  
(Tianjin Normal University), Tianjin Key Laboratory of Structure and Performance  
for Functional Molecule, College of Chemistry, Tianjin Normal University, Tianjin,  
300387, P.R. China*

\* E-mail: nkliyan398@gmail.com

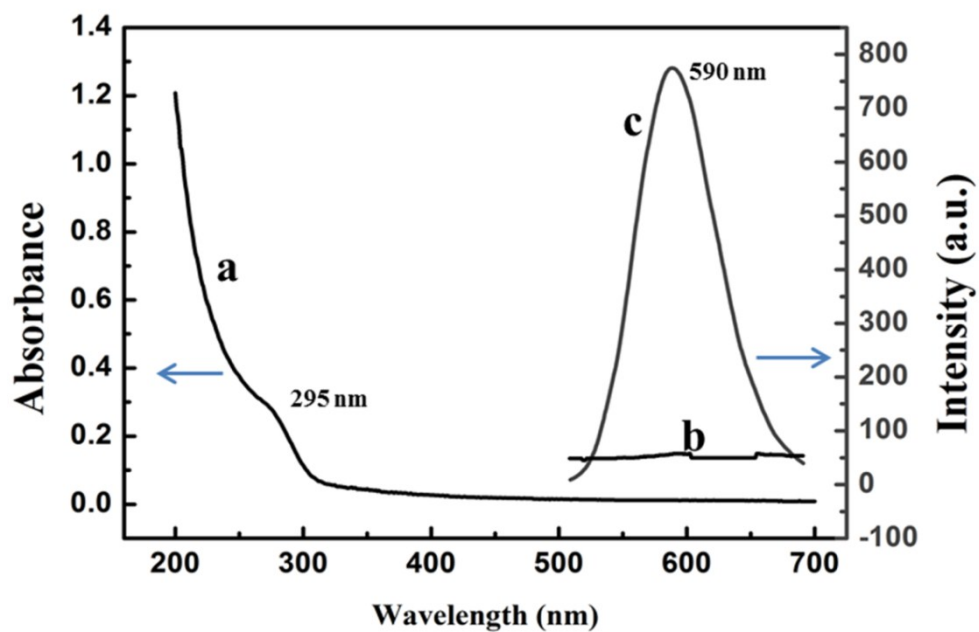

**Fig. S1.** The excitation spectrum (curve a), RTP emission spectrum of phosphorescent QDs after aging at 50 °C under open air for 2 h (curve c) and not aging (curve b).

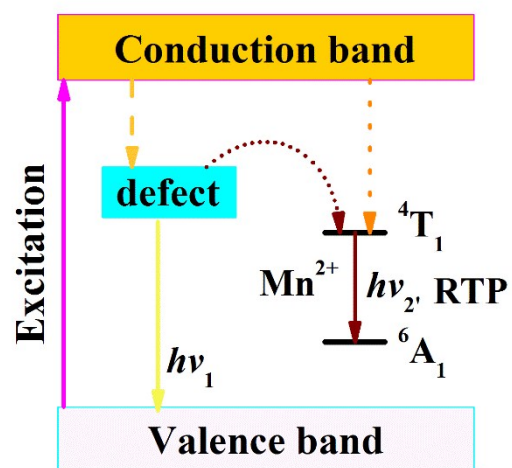

**Fig. S2.** schematic illustration of electronic transition.

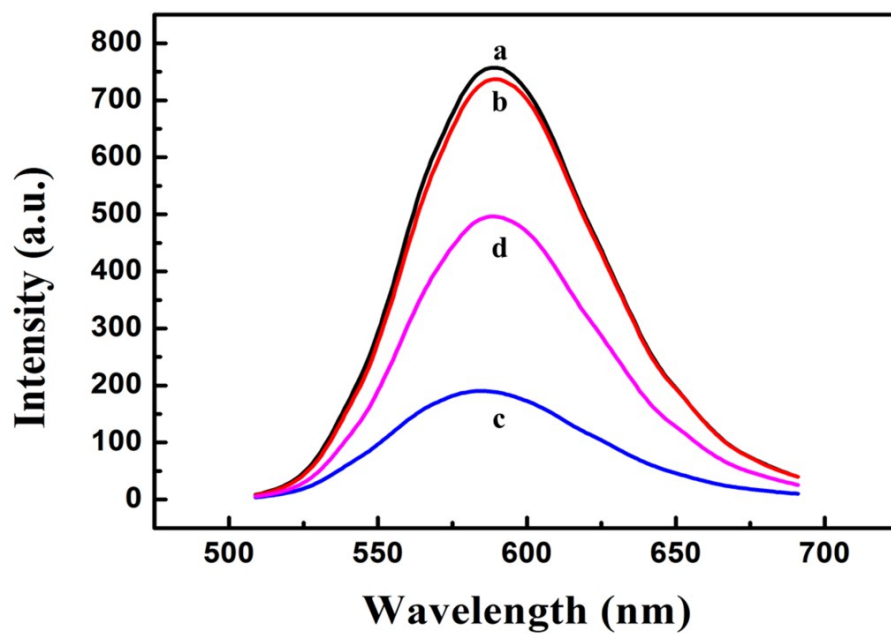

**Fig. S3.** Phosphorescence spectra of QDs (curve a), QDs+thrombin (curve b), QDs+TBA-BHQ<sub>2</sub> (curve c), and QDs/TBA-BHQ<sub>2</sub>+thrombin (curve d).

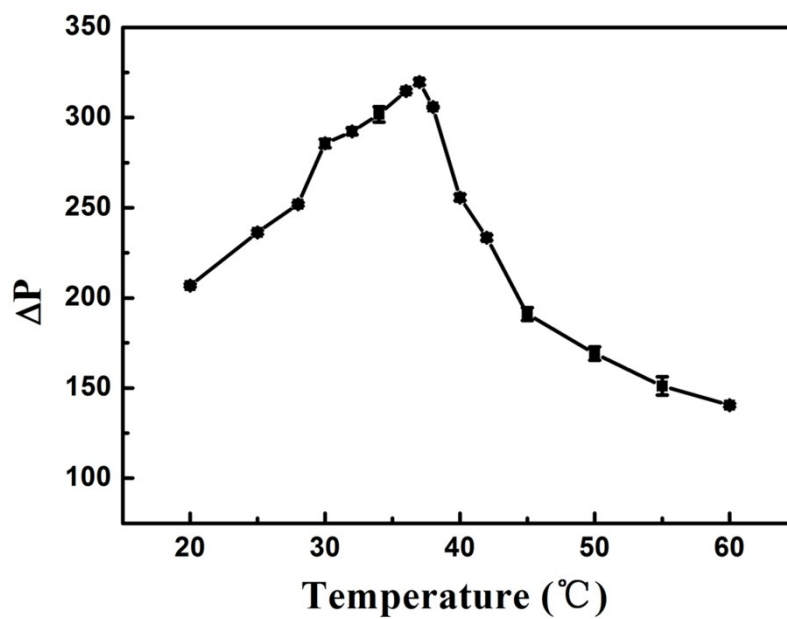

**Fig. S4.** The influence of different temperature on the “off-on” phosphorescence aptasensor system.
